# Supplementary material for: Giovan Domenico Olivieri, autor de dos Relieves Anónimos de la Academia
Source: Royal Society of Chemistry journal article supplement (doi:10.1039/c8ra07134a), 1988-01-01
Supplement: c8ra07134a1.pdf [file c8ra07134a1.pdf]

## Supporting Information

### Crystal Structure, Magnetic and Thermal Properties of Basic Copper Formates with Two-dimensional Triangular Lattice Magnetic Networks

Wataru Fujita<sup>a</sup>

<sup>a</sup> General Education, Faculty of Science and Technology, Seikei University, 3-3-1 Kichijoji-kita machi, Musashino, Tokyo, 180-8603, Japan.

E-mail: fujitaw@st.seikei.ac.jp

|                                           |    |
|-------------------------------------------|----|
| 1. Photograph of the byproducts           | S2 |
| 2. Infrared spectrum of <b>1</b>          | S3 |
| 3. Crystal Structure of <b>2</b>          | S4 |
| 4. Crystal Structure of <b>3</b>          | S5 |
| 5. Magnetic interaction paths in <b>1</b> | S6 |

## 1. Photograph of products

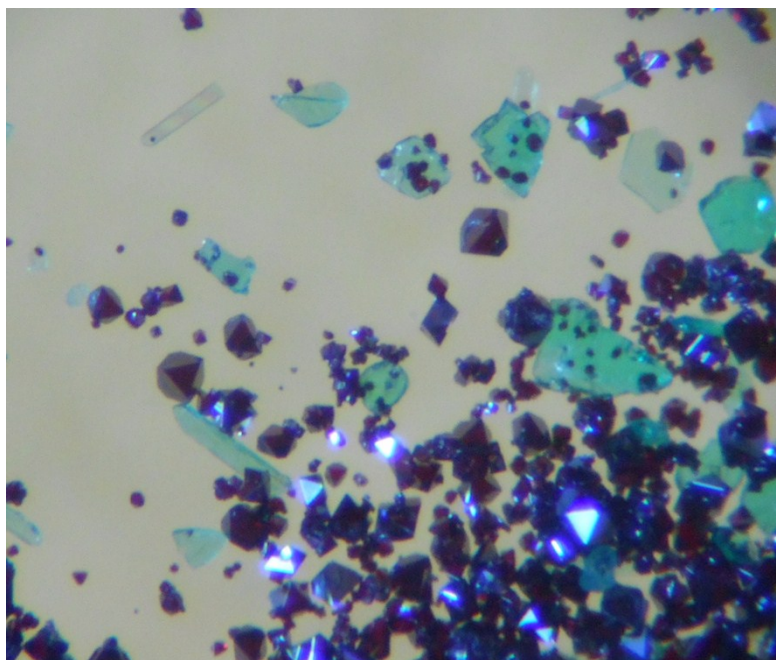

Figure S1. Photograph of the products obtained by hydrolysis of the solution at 75 °C. The greenish plates are **1**. The dark red crystals are  $\text{Cu}_2\text{O}$ .

## 2. Infrared spectrum of 1

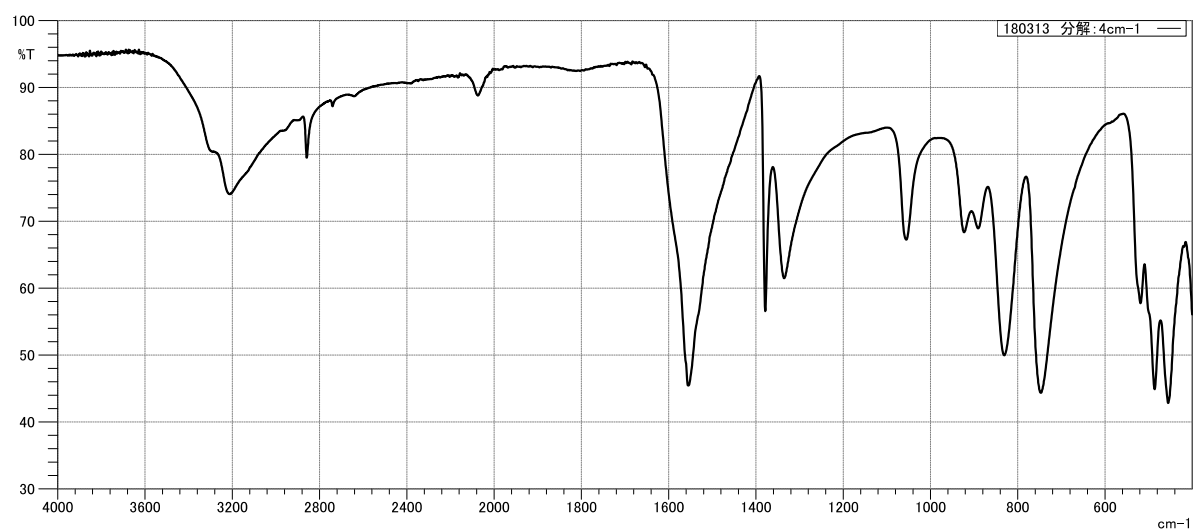

Figure S2. Infrared spectrum of 1.

### 3. Crystal Structure of 2

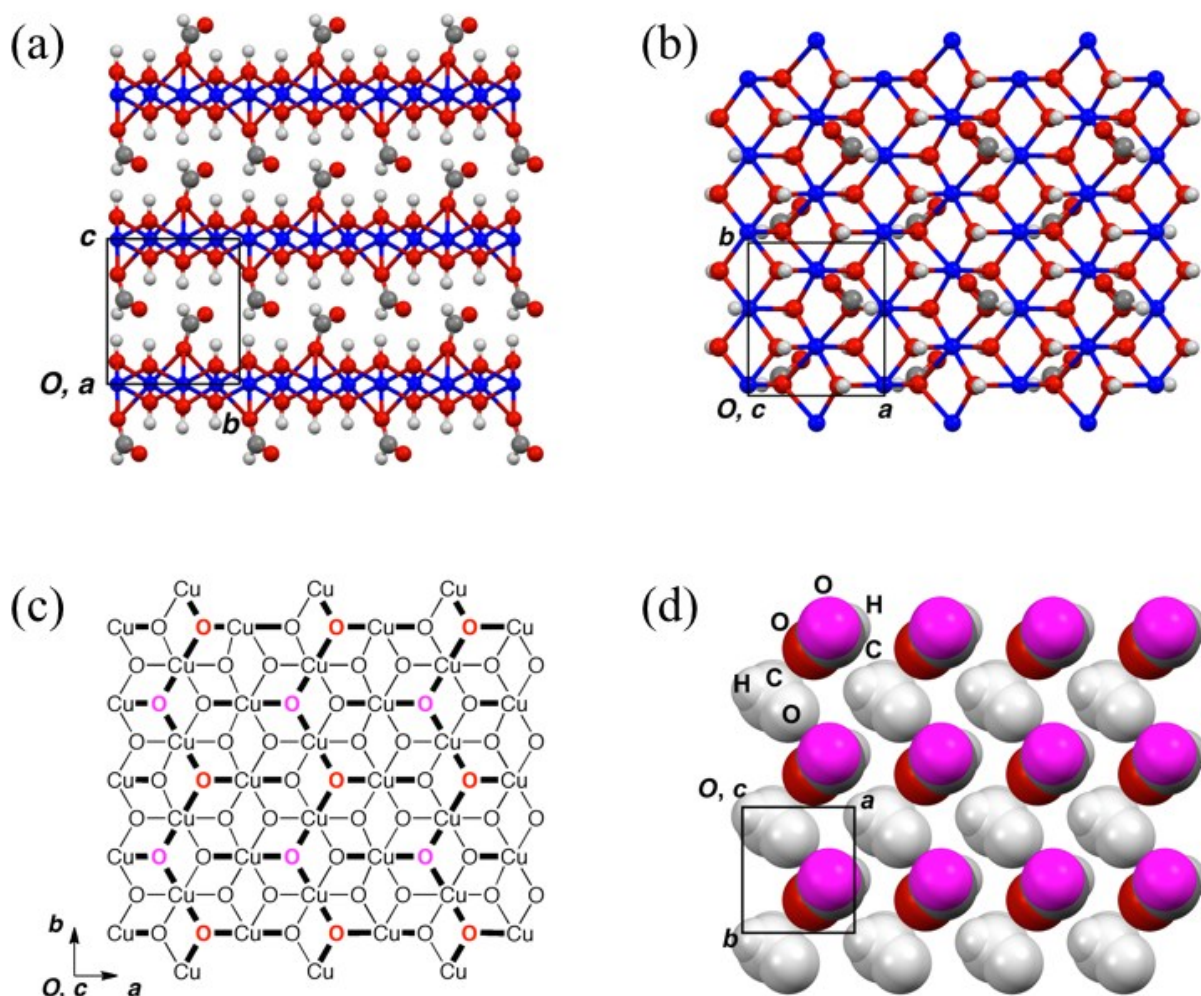

Figure S3. Crystal structure of **2**. Spheres correspond to Cu (blue), O (red), C (dark grey), and H (light grey). (a) Stacking of the copper hydroxide layers and the organic anion layers. (b) Projection of the atomic arrangement of the copper hydroxide layer along the  $c$  axis. (c) Schematic representation of the copper hydroxide layer of **2**. The bold lines are the axial bonds. Coloured O's correspond to the oxygen atom of formate anions. (d) Molecular alignment of formate ions in **1**. Spheres correspond to O (red, magenta), C (dark grey), and H (light grey). The light gray formate ions are coordinating to the neighboring copper hydroxide layer.

#### 4. Crystal Structure of **3**

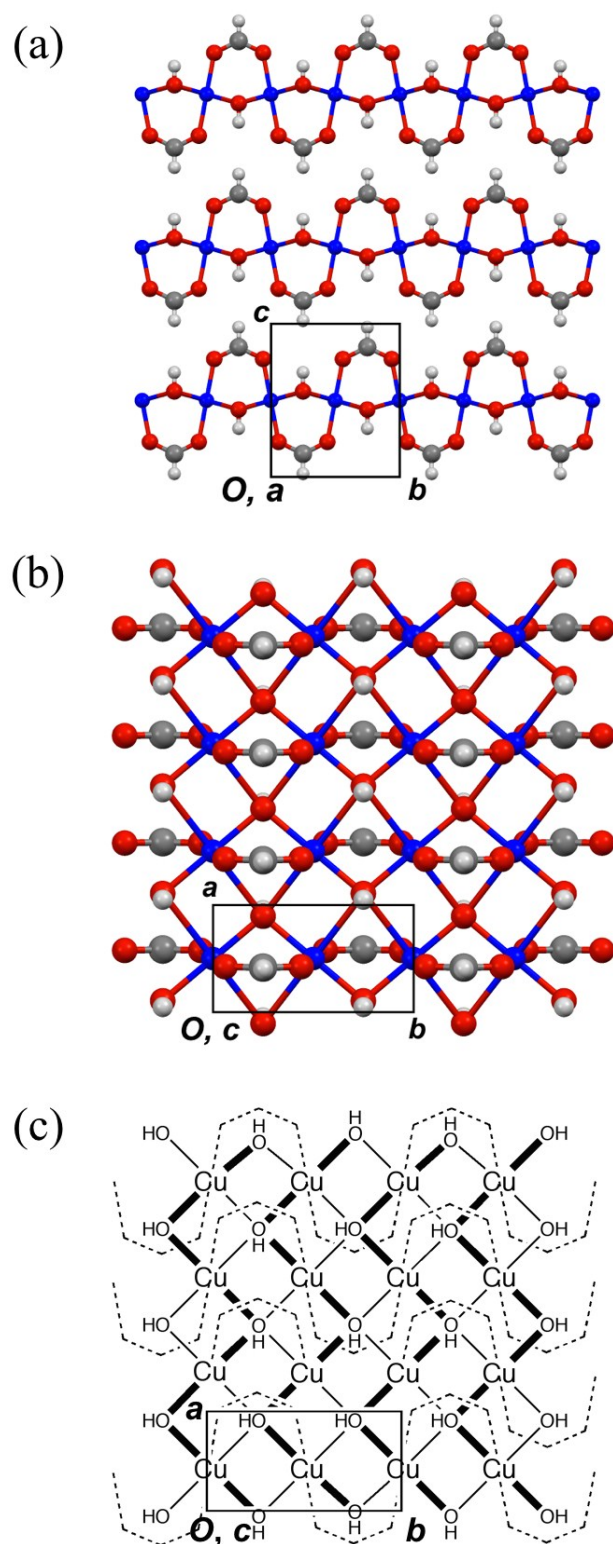

Figure S4. Crystal structure of **3**. Spheres correspond to Cu (blue), O (red), C (dark grey), and H (light grey). (a) Stacking of the copper hydroxide layers. (b) Projection of the atomic arrangement of the copper hydroxide layer along the  $c$  axis. (c) Schematic representation of the copper hydroxide layer. The bold lines are the axial bonds. Broken lines are carboxylate groups of formate ions bridging copper ions.



## 5. Magnetic interaction pathways in **1**

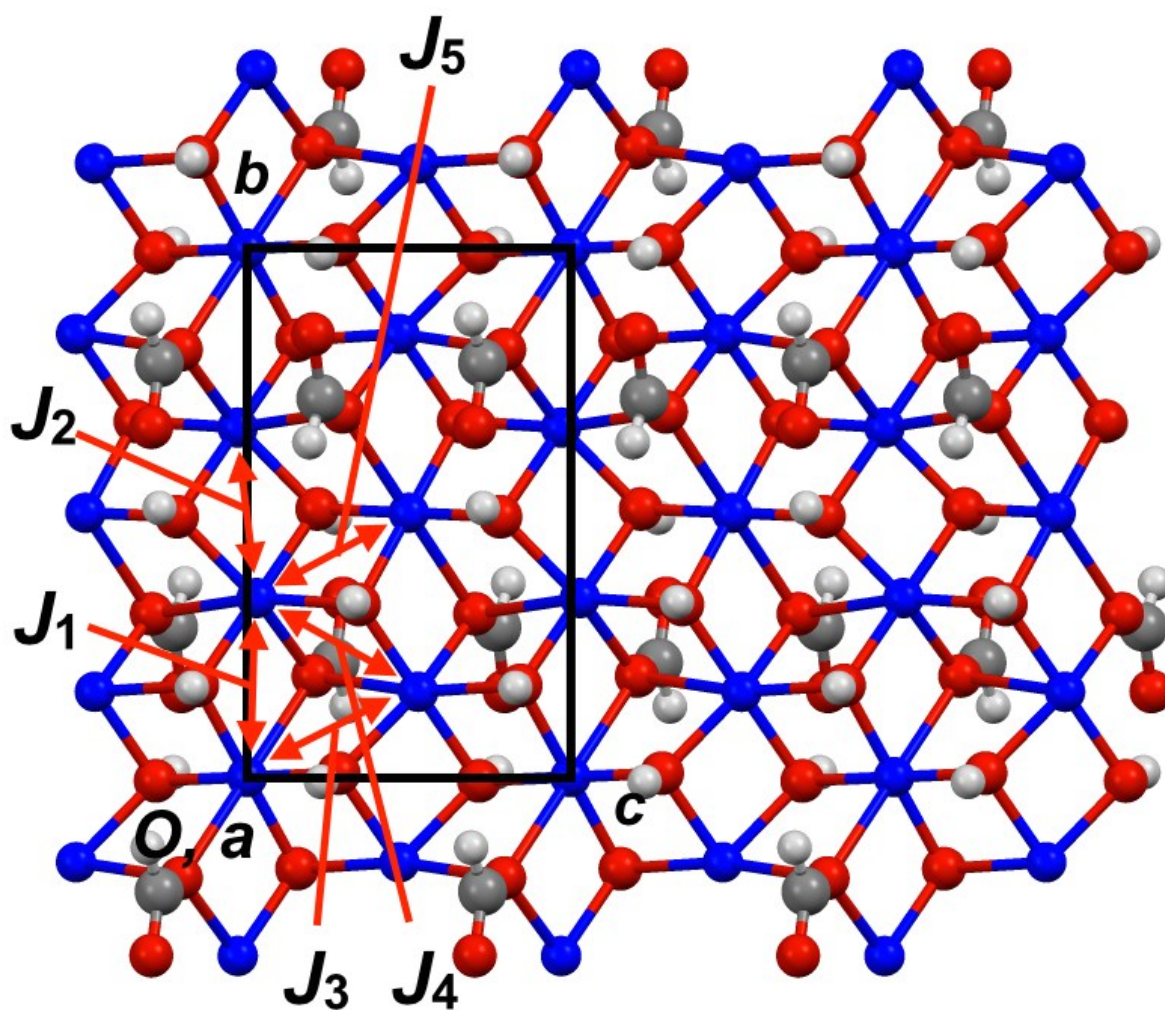

Figure S5. Five kinds of magnetic interaction pathways in the copper hydroxide layer of **1**.
